# Supplementary material for: Astragaloside IV Inhibits Oxidative Stress-Induced Mitochondrial Permeability Transition Pore Opening by Inactivating GSK-3βvia Nitric Oxide in H9c2 Cardiac Cells
Source: Hindawi journal article supplement (doi:10.1155/2012/935738), 2012-01-01
Supplement: f1 [file 935738.f1.pdf]

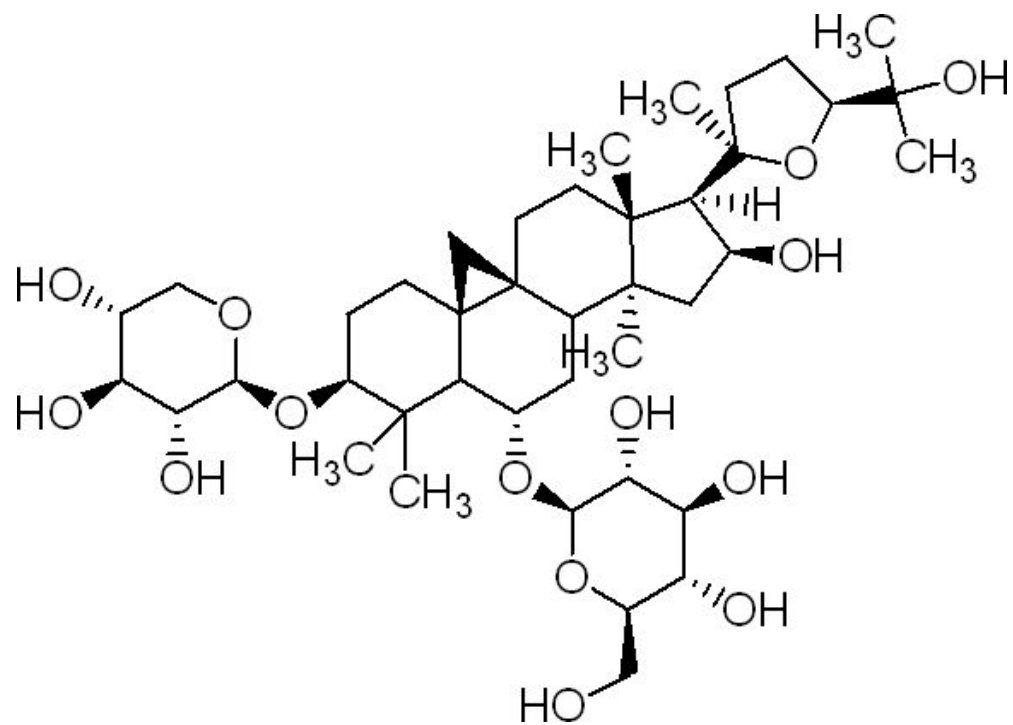

**Figure 1S:** Chemical structure of Astragaloside IV (C<sub>41</sub>H<sub>68</sub>O<sub>14</sub>, Molecular Weight 784.97)

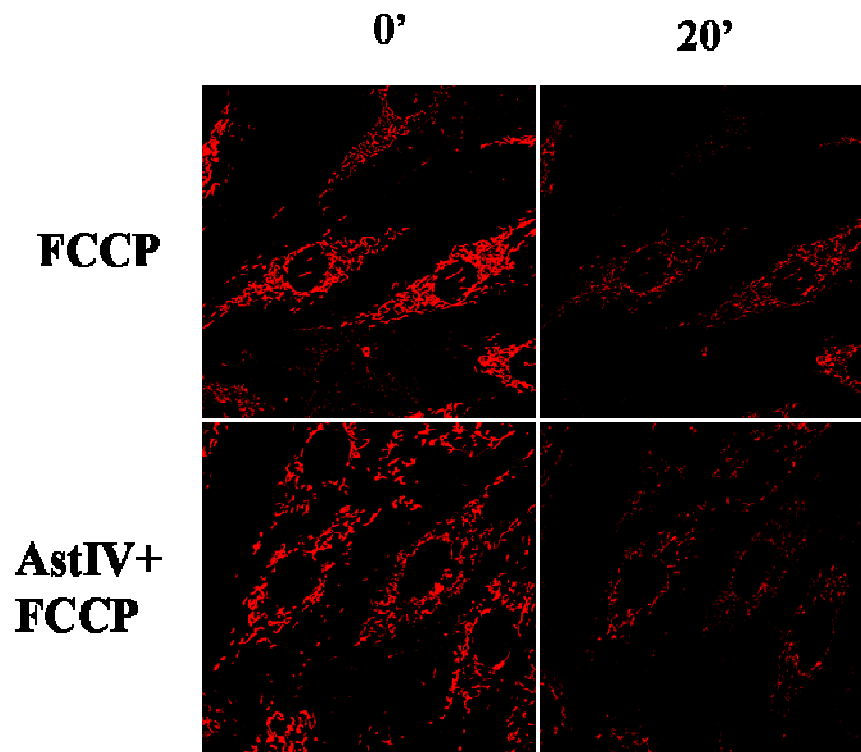

**Figure 2S:** Confocal fluorescence images of TMRE at baseline and 20 min after exposure to 0.5 μM FCCP in H9c2 cells. Astragaloside IV did not change the mitochondrial uncoupler FCCP-induced TMRE fluorescence.

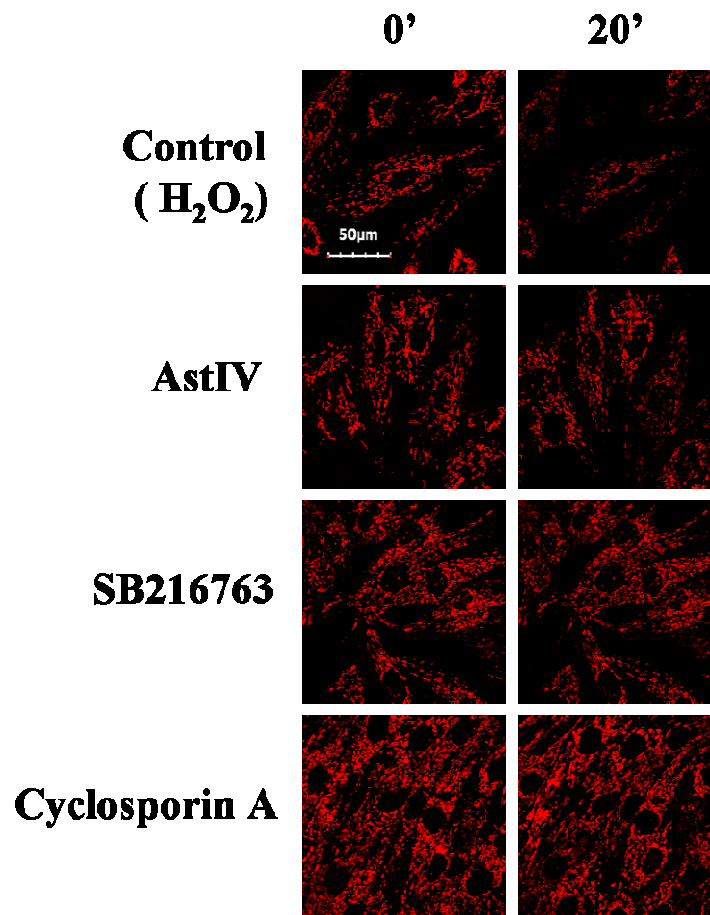

**Figure 3S:** Confocal fluorescence images of TMRE at baseline and 20 min after exposure to 500  $\mu\text{M}$   $\text{H}_2\text{O}_2$ . Astragaloside IV prevented oxidant-induced TMRE fluorescence reduction in a dose-dependent manner. The GSK-3 $\beta$  inhibitor SB216763 (3  $\mu\text{M}$ ) and the specific mPTP inhibitor cyclosporin A (0.2  $\mu\text{M}$ ) could mimic the effect of astragaloside IV to prevent the loss of TMRE fluorescence.

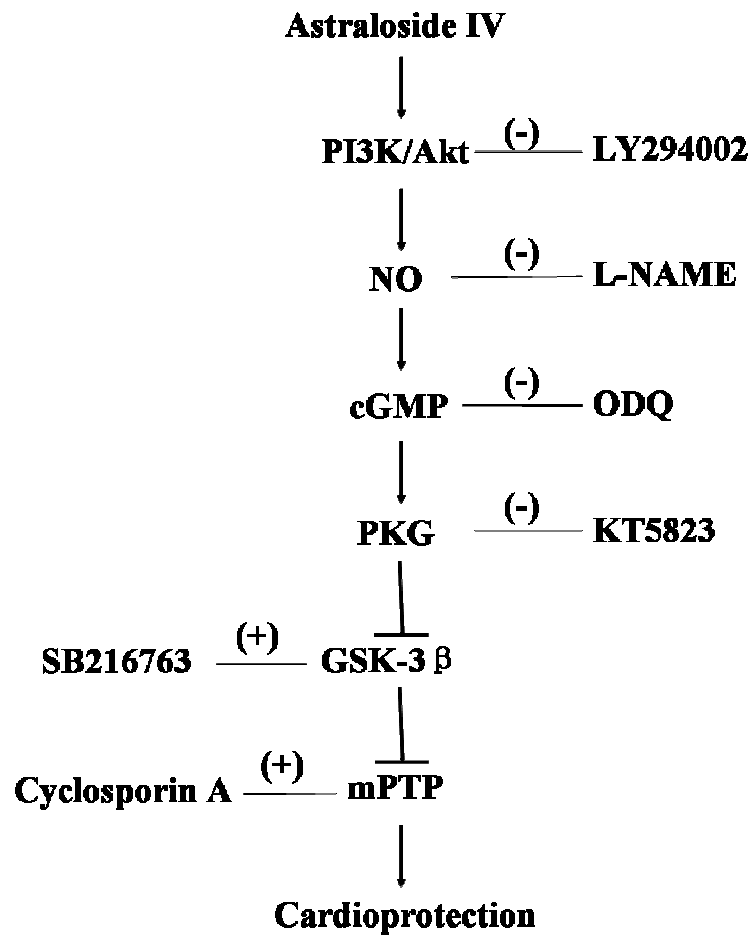

**Figure 4S:** The signaling mechanism responsible for the cardioprotective effects of astragaloside IV.
